# Supplementary material
Source: MDPI journal article supplement (https://www.mdpi.com/2304-6740/11/4/152)
Supplement: s1 [file s1]

## Supporting file

### Complexes of 2-amino-3-methylpyridine and 2-amino-4-methylbenzothiazole with Ag(I) and Cu(II), structure and biological applications

Muhammad Hanif, Awal Noor, Mian Muhammad, Farhat Ullah, Muhammad Nawaz Tahir, Gul Shahzada Khan, Ezzat Khan

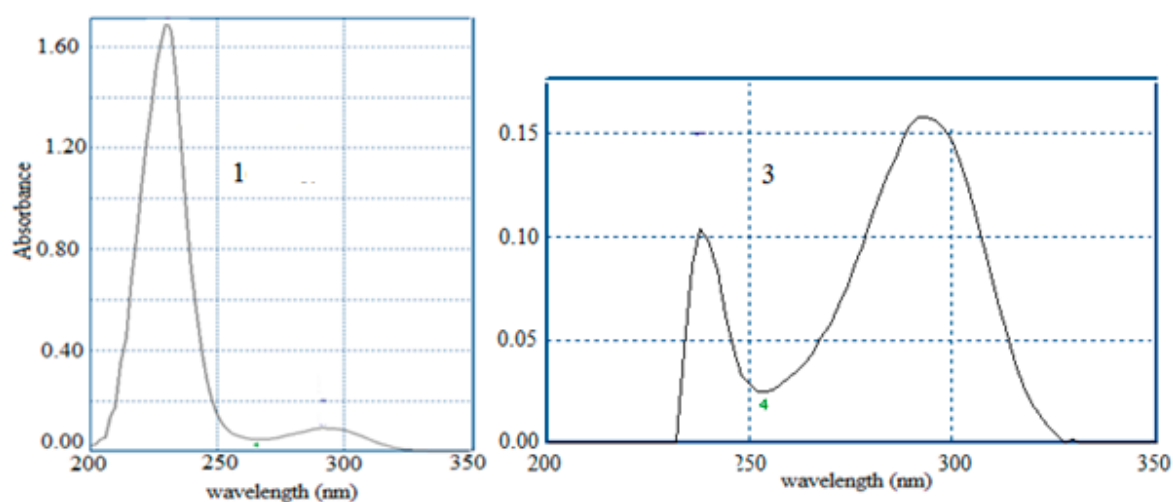

Figure S1 UV-visible spectra of copper complexes 1 and 3.

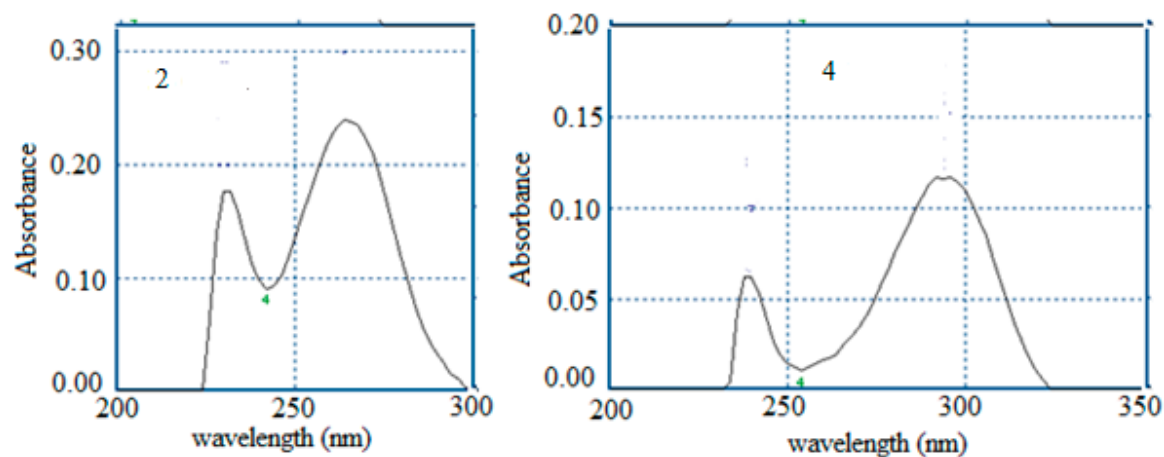

Figure S2 UV-visible spectra of silver complexes 2 and 4.

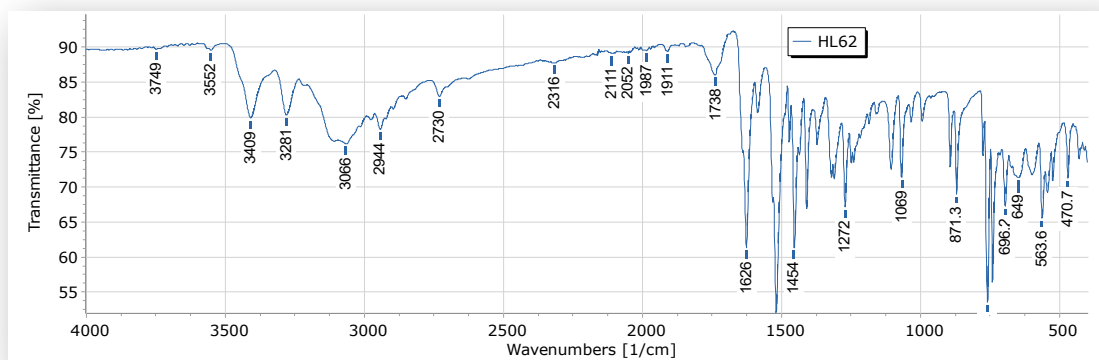

**Figure S3** FT-IR spectrum of compound 1

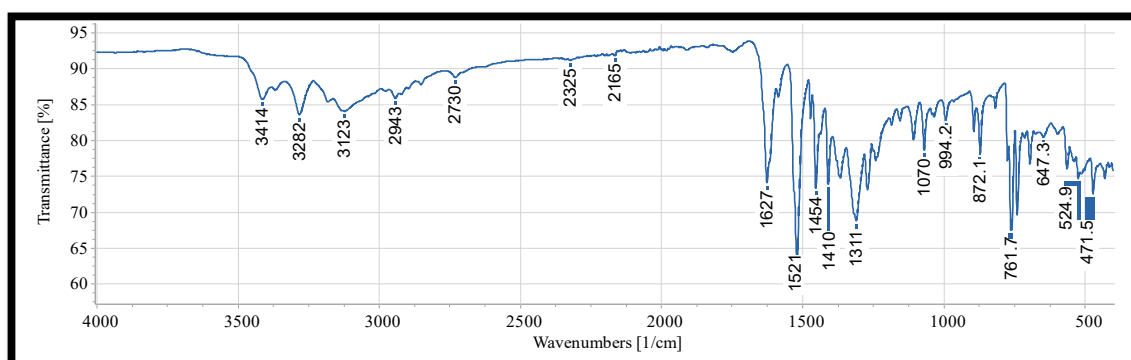

**Figure S4** FT-IR spectrum of compound 2

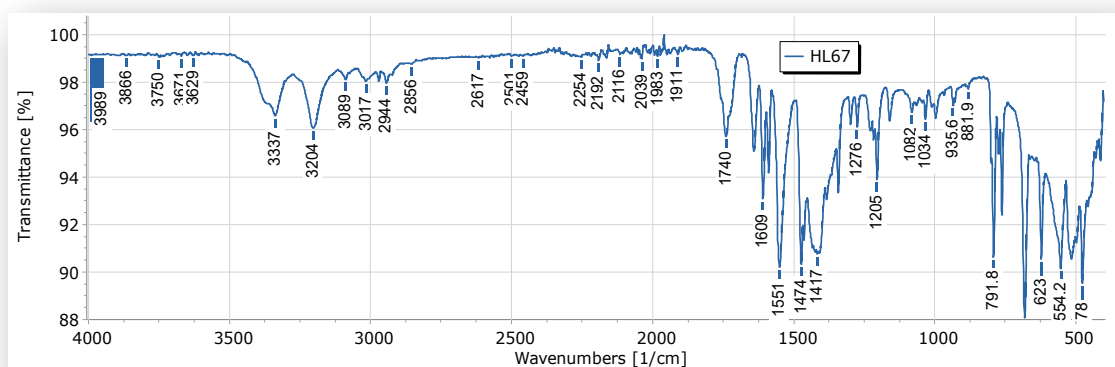

**Figure S5** FT-IR spectrum of compound 3

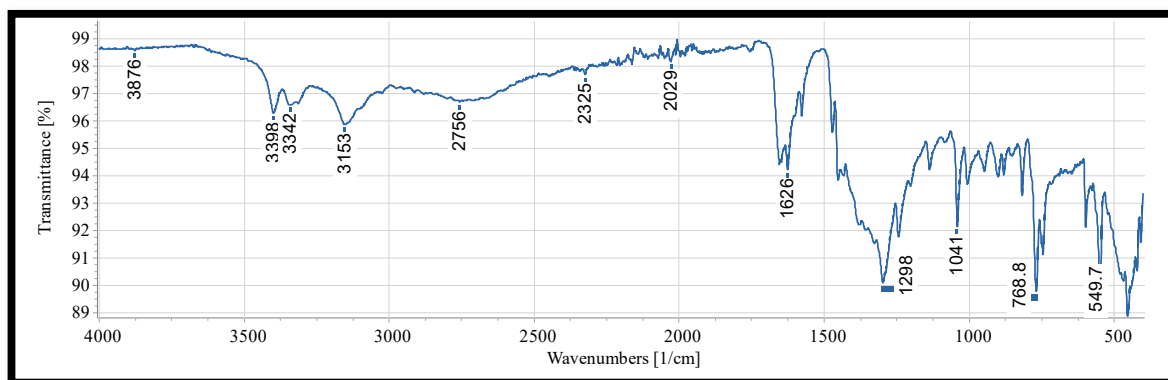

**Figure S6** FT-IR spectrum of compound 4

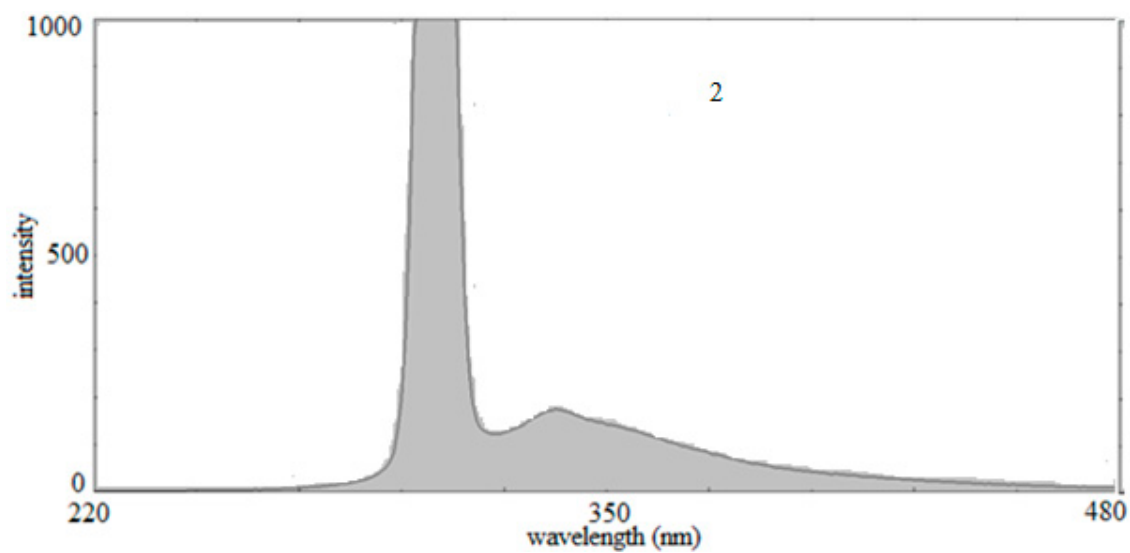

**Figure S7** Luminescence spectrum of compound 2

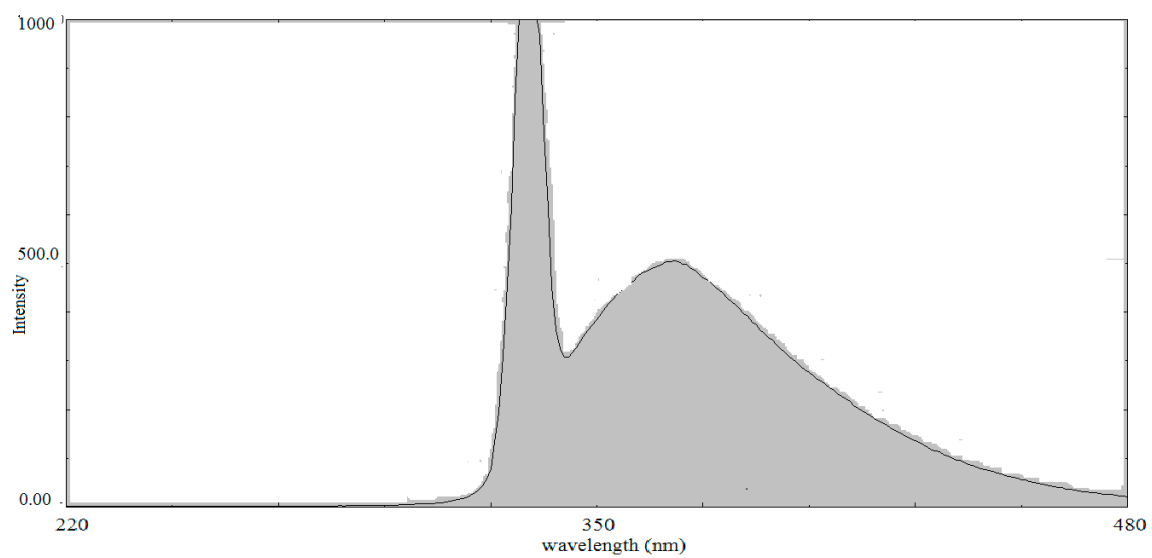

**Figure S8** Luminescence spectrum of compound **3**

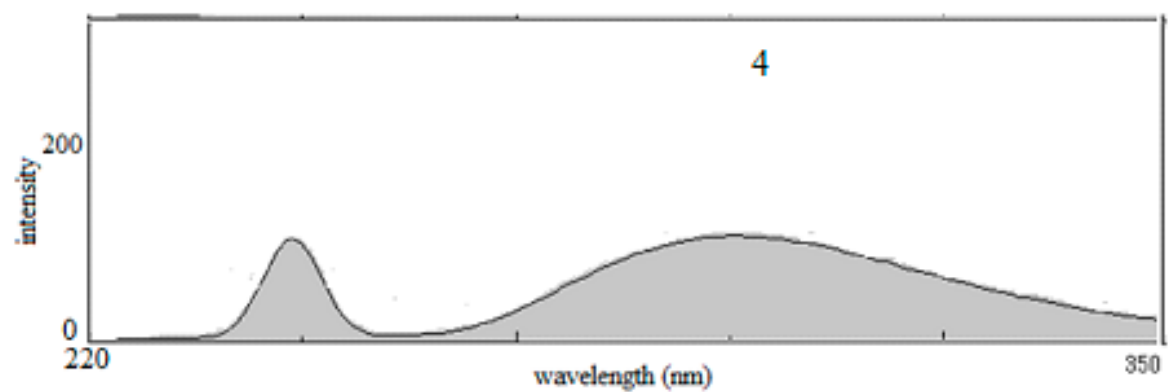

**Figure S9** Luminescence spectrum of compound **4**

**Table S1.** Antibacterial zones of inhibition measured in mm for compounds 1-4.

| Compound | Inhibition zone against <i>K. Pnamonia</i> | Inhibition zone against <i>Streptococcus</i> |
|----------|--------------------------------------------|----------------------------------------------|
| 1        | 9                                          | 13                                           |
| 2        | 16                                         | 18                                           |
| 3        | 16                                         | 07                                           |
| 4        | 9                                          | 16                                           |
| Standard | Cefixime = 18                              | Azithromycin = 19.5                          |

**Table S2.** Antioxidant potentials for compounds 1-4.

| Compound      | ABTS, IC <sub>50</sub> (µg/mL) | DPPH, IC <sub>50</sub> (µg/mL) |
|---------------|--------------------------------|--------------------------------|
| 1             | 199                            | 151                            |
| 2             | 225                            | 241                            |
| 3             | 280                            | 451                            |
| 4             | 490                            | 851                            |
| Ascorbic acid | 04                             | 02                             |

**Table S3** IC<sub>50</sub> values of compounds as AChE and BChE enzyme inhibitors

| Compound    | AChE, IC <sub>50</sub> (µg/mL) | BChE, IC <sub>50</sub> (µg/mL) |
|-------------|--------------------------------|--------------------------------|
| 1           | 0.95                           | 0.87                           |
| 2           | 230                            | 195                            |
| 3           | 275                            | 220                            |
| 4           | 280                            | 237                            |
| Galantamine | 0.56                           | 0.55                           |
